# Supplementary material for: Structural basis of pseudoGTPase-mediated protein-protein interactions
Source: PubMed Central journal article supplement — bioRxiv. 2024 Nov 1:2024.10.30.620932. Preprint. [Version 1] doi: 10.1101/2024.10.30.620932 (PMC11565788; doi:10.1101/2024.10.30.620932), 2024-11-01
Supplement: media-3.pdf [file media-3.pdf]

|                                        | <b>AAGAB psGD E144K</b>           | <b>psGD:AP1σ3</b>                |
|----------------------------------------|-----------------------------------|----------------------------------|
| <b>Data Collection</b>                 |                                   |                                  |
| Wavelength (Å)                         | 0.99228                           | 0.97918                          |
| Resolution range (Å)                   | 45.14 – 1.78 (1.844 – 1.78)       | 46.43 – 1.68 (1.74 – 1.68)       |
| Space group                            | P 21 21 21                        | P 21 21 21                       |
| Unit cell (a, b, c, Å)<br>(α, β, γ, °) | 39.268 94.349 102.796<br>90 90 90 | 50.294 61.608 92.854<br>90 90 90 |
| Unique reflections                     | 34572 (2096)                      | 33173 (3112)                     |
| Multiplicity                           | 9.6 (2.9)                         | 12.9 (11.9)                      |
| Completeness (%)                       | 93 (63)                           | 98.68 (94.16)                    |
| Mean I/sigma(I)                        | 14.4 (0.7)                        | 18.51 (2.39)                     |
| Wilson B-factor                        | 23.70                             | 26.20                            |
| R-merge                                | 0.119 (0.841)                     | 0.07416 (0.8291)                 |
| R-meas                                 | 0.125 (0.985)                     | 0.07728 (0.8663)                 |
| R-pim                                  | 0.037 (0.494)                     | 0.02136 (0.2458)                 |
| CC1/2                                  | 1.004 (0.508)                     | 0.999 (0.872)                    |
| CC*                                    |                                   | 1 (0.965)                        |
| <b>Refinement</b>                      |                                   |                                  |
| Reflections used in refinement         | 34542 (2082)                      | 33173 (3111)                     |
| Reflections used for R-free            | 1980 (119)                        | 1995 (187)                       |
| R-work                                 | 0.1883 (0.3501)                   | 0.1825 (0.2267)                  |
| R-free                                 | 0.2071 (0.3737)                   | 0.2113 (0.2546)                  |
| Number of non-hydrogen atoms           | 2942                              | 2669                             |
| macromolecules                         | 2569                              | 2346                             |
| solvent                                | 373                               | 323                              |
| Protein residues                       | 330                               | 288                              |
| RMS (bonds, Å)                         | 0.009                             | 0.008                            |
| RMS (angles, °)                        | 1.20                              | 1.07                             |
| Ramachandran favored (%)               | 99.07                             | 99.29                            |
| Ramachandran allowed (%)               | 0.93                              | 0.71                             |
| Ramachandran outliers (%)              | 0.00                              | 0.00                             |
| Rotamer outliers (%)                   | 1.03                              | 0.38                             |
| Clashscore                             | 0.98                              | 4.06                             |
| Average B-factor                       | 28.49                             | 30.40                            |
| macromolecules                         | 27.49                             | 29.44                            |
| solvent                                | 35.34                             | 37.44                            |
| <b>Number of TLS groups</b>            | <b>1</b>                          | <b>1</b>                         |

**Table S1.** Crystallography data collection and refinement statistics. Values in parentheses are for the highest resolution shell.
